# Supplementary material
Source: PubMed Central journal article supplement (PMC1885588)

**RNR3 mRNA**

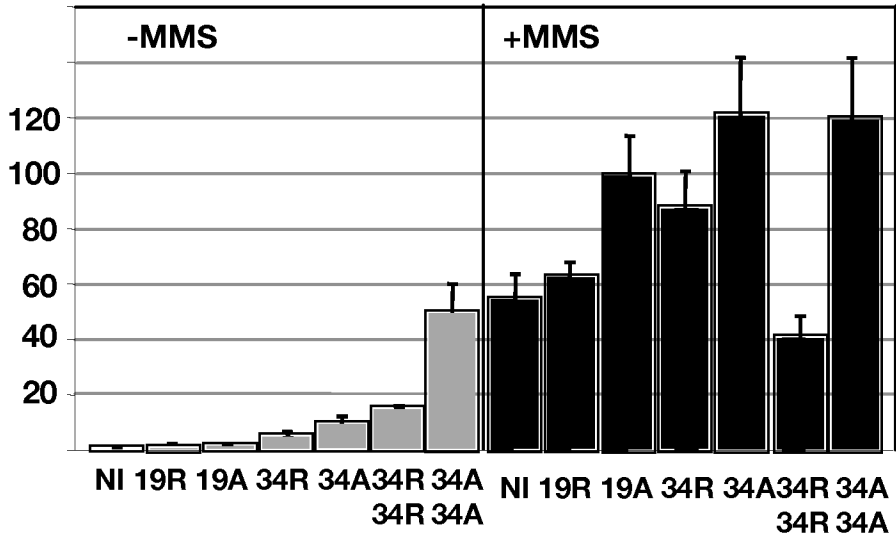

Supplement: pnas_0701666104_1.pdf [file pnas_0701666104_1.pdf]

**RNR3 mRNA**

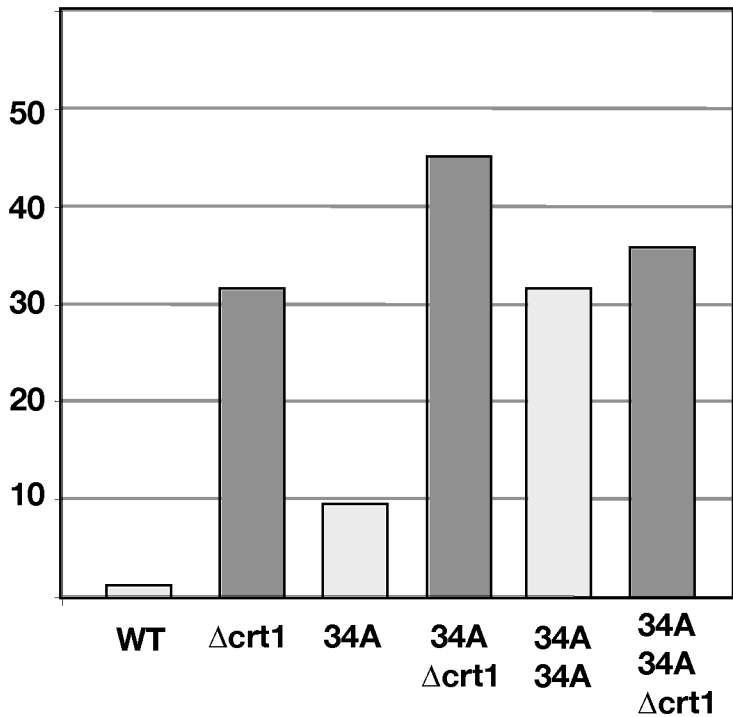

Supplement: pnas_0701666104_2.pdf [file pnas_0701666104_2.pdf]

**A**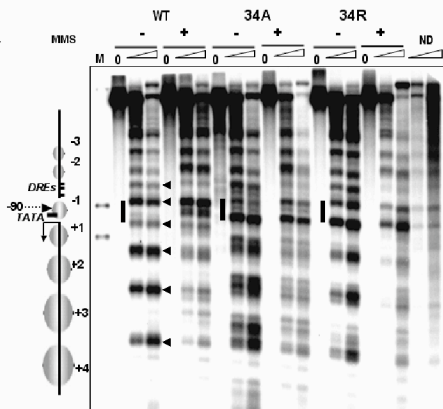**B**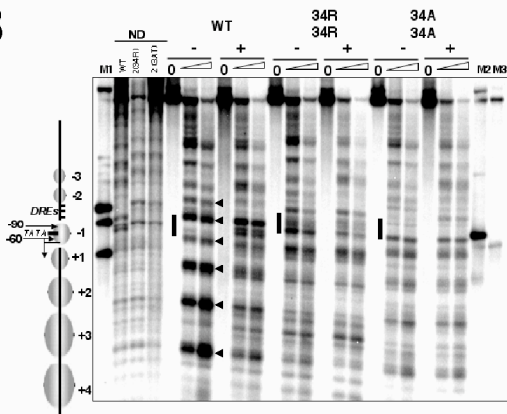

Supplement: pnas_0701666104_3.pdf [file pnas_0701666104_3.pdf]
